# Supplementary material
Source: PubMed Central journal article supplement (PMC5549104)
Supplement: NIHMS882653-supplement-Sup_Tables_1_2_3_4_6.pdf [file NIHMS882653-supplement-Sup_Tables_1_2_3_4_6.pdf]

**Supplementary Table 1. NSD1 mutations in samples included in the H3K36 cluster.** Hugo Symbol NSD1, Chromosome 5.

| Sample ID                    | Protein Change | Mutation Type        | Start Position | End Position | Reference Allele | Variant Allele | Allele Frequency | Mutation Assessor | Note                                                            |
|------------------------------|----------------|----------------------|----------------|--------------|------------------|----------------|------------------|-------------------|-----------------------------------------------------------------|
| TCGA-BA-5555-01A-01D-1512-08 | p.R788X        | Nonsense             | 176637762      | 176637762    | C                | T              | 0.464286         |                   |                                                                 |
| TCGA-CV-5441-01A-01D-1512-08 | p.H1872fs      | Frame_Shift_Del      | 176700778      | 176700779    | AT               | -              | 0.463415         |                   |                                                                 |
| TCGA-CV-7409-01A-31D-2229-08 | p.Q1153X       | Nonsense             | 176638857      | 176638857    | C                | T              | NA               |                   |                                                                 |
| TCGA-BB-7870-01A-11D-2229-08 | p.E990X        | Nonsense             | 176638368      | 176638368    | G                | T              | 0.778325         |                   |                                                                 |
| TCGA-BA-6869-01A-11D-1870-08 | p.S707X        | Nonsense             | 176637520      | 176637520    | C                | G              | 0.621212         |                   |                                                                 |
| TCGA-CV-6960-01A-41D-2012-08 | p.G1678W       | Missense             | 176687055      | 176687055    | G                | T              | 0.309524         | Medium            |                                                                 |
| TCGA-CV-7245-01A-11D-2012-08 | p.E1534X       | Nonsense             | 176675284      | 176675284    | G                | T              | 0.75             |                   |                                                                 |
| TCGA-CR-7402-01A-11D-2012-08 | p.G1524fs      | Frame_Shift_Del      | 176675254      | 176675254    | G                | -              | 0.310345         |                   |                                                                 |
| TCGA-CR-7402-01A-11D-2012-08 | p.P2567T       | Missense             | 176722068      | 176722068    | C                | A              | 0.1              | Neutral           | Sample also has NSD1 frame shift deletion and nonsense mutation |
| TCGA-CR-7402-01A-11D-2012-08 | p.Q1989X       | Nonsense             | 176709538      | 176709538    | C                | T              | 0.20339          |                   |                                                                 |
| TCGA-CR-7402-01A-11D-2012-08 | p.T723S        | Missense             | 176637567      | 176637567    | A                | T              | 0.297619         | Neutral           | Sample also has NSD1 frame shift deletion and nonsense mutation |
| TCGA-CR-7364-01A-11D-2012-08 | p.E1979X       | Nonsense             | 176709508      | 176709508    | G                | T              | 0.336735         |                   |                                                                 |
| TCGA-CV-7253-01A-11D-2012-08 | p.S1086fs      | Frame_Shift_Del      | 176638656      | 176638662    | AGTAAAG          | -              | 0.25             |                   |                                                                 |
| TCGA-CR-7398-01A-11D-2012-08 | p.S1528fs      | Frameshift Insertion | 176675268      | 176675268    | -                | A              | 0.0333333        |                   |                                                                 |
| TCGA-CV-7250-01A-11D-2012-08 | p.S1359X       | Nonsense             | 176665392      | 176665392    | C                | A              | 0.692982         |                   |                                                                 |
| TCGA-CV-7242-01A-11D-2012-08 | p.A2009T       | Missense             | 176710803      | 176710803    | G                | A              | 0.268041         | High              |                                                                 |
| TCGA-CR-5247-01A-01D-2012-08 | p.Y1997C       | Missense             | 176709563      | 176709563    | A                | G              | 0.695652         | High              |                                                                 |
| TCGA-CN-4727-01A-01D-1434-08 | p.G1928X       | Nonsense             | 176707725      | 176707725    | G                | T              | 0.222222         |                   |                                                                 |
| TCGA-CN-4727-01A-01D-1434-08 | p.G959X        | Nonsense             | 176638275      | 176638275    | G                | T              | 0.235294         |                   |                                                                 |
| TCGA-CN-4730-01A-01D-1434-08 | p.S589fs       | Frame_Shift_Del      | 176637167      | 176637168    | TT               | -              | 0.480519         |                   |                                                                 |
| TCGA-CN-5356-01A-01D-1434-08 | p.K1433X       | Nonsense             | 176666861      | 176666861    | A                | T              | 0.439024         |                   |                                                                 |
| TCGA-F7-7848-01A-11D-2129-08 | p.M1094fs      | Frame_Shift_Del      | 176638682      | 176638682    | G                | -              | 0.453125         |                   |                                                                 |
| TCGA-CV-7440-01A-11D-2129-08 | p.C1619S       | Missense             | 176684042      | 176684042    | G                | C              | 0.448276         | Medium            | Sample also has NSD1 nonsense mutation                          |
| TCGA-CV-7440-01A-11D-2129-08 | p.C792X        | Nonsense             | 176637776      | 176637776    | C                | A              | 0.22449          |                   |                                                                 |
| TCGA-CV-6941-01A-11D-1912-08 | p.R1473X       | Nonsense             | 176673717      | 176673717    | C                | T              | 0.578947         |                   |                                                                 |
| TCGA-CV-A461-01A-41D-A25Y-08 | p.R1757fs      | Frame_Shift_Del      | 176694686      | 176694686    | G                | -              | 0.217687         |                   |                                                                 |
| TCGA-CV-A461-01A-41D-A25Y-08 | p.S981fs       | frameshift insertion | 176638343      | 176638343    | -                | G              | 0.159091         |                   |                                                                 |
| TCGA-BA-A41F-01A-11D-A25Y-08 | p.P1665L       | Missense             | 176687017      | 176687017    | C                | T              | 0.496            | Medium            |                                                                 |
| TCGA-CN-A497-01A-11D-A24D-08 | p.E1391X       | Nonsense             | 176665487      | 176665487    | G                | T              | 0.325581         |                   |                                                                 |
| TCGA-CN-A497-01A-11D-A24D-08 | p.W2032X       | Nonsense             | 176710873      | 176710873    | G                | A              | 0.382353         |                   |                                                                 |
| TCGA-CN-A63W-01A-11D-A30E-08 | p.W1160X       | Nonsense             | 176638879      | 176638879    | G                | A              | 0.785714         |                   |                                                                 |
| TCGA-CN-A641-01A-11D-A30E-08 | p.C1897F       | Missense             | 176707633      | 176707633    | G                | T              | 0.342105         | High              | Sample also has NSD1 frame shift insertion                      |
| TCGA-CN-A641-01A-11D-A30E-08 | p.I1946fs      | frameshift insertion | 176707779      | 176707779    | -                | T              | 0.136364         |                   |                                                                 |
| TCGA-CN-A641-01A-11D-A30E-08 | p.R1948I       | Missense             | 176707785      | 176707785    | CG               | AT             | 0.162162         | Medium            | Sample also has NSD1 frame shift insertion                      |
| TCGA-CN-A63T-01A-11D-A28R-08 |                | Splice               | 176719160      | 176719160    | G                | A              | 0.2              |                   |                                                                 |
| TCGA-CN-A63T-01A-11D-A28R-08 | p.E1970A       | Missense             | 176709482      | 176709482    | A                | C              | 0.190789         | High              | Sample also has NSD1 splicing mutation                          |
| TCGA-BB-A5HZ-01A-21D-A28R-08 | p.G1095fs      | Frame_Shift_Del      | 176638683      | 176638693    | GCCACTTAA        | -              | 0.215909         |                   |                                                                 |
| TCGA-BB-A5HZ-01A-21D-A28R-08 | p.I1291fs      | Frameshift Insertion | 176662896      | 176662896    | -                | T              | 0.2              |                   |                                                                 |
| TCGA-P3-A5QF-01A-11D-A28R-08 | p.R2005Q       | Missense             | 176710792      | 176710792    | G                | A              | 0.59375          | Medium            |                                                                 |
| TCGA-KU-A66S-01A-21D-A30E-08 | p.H1616Y       | Missense             | 176684032      | 176684032    | C                | T              | 0.348485         | Medium            | Sample also has NSD1 frame shift deletion                       |
| TCGA-KU-A66S-01A-21D-A30E-08 | p.R1952fs      | Frame_Shift_Del      | 176707798      | 176707798    | G                | -              | 0.363636         |                   |                                                                 |
| TCGA-CN-A63U-01A-11D-A30E-08 | p.E1501X       | Nonsense             | 176675185      | 176675185    | G                | T              | 0.625            |                   |                                                                 |
| TCGA-CQ-7072-01A-21D-A30E-08 | p.Q679X        | Nonsense             | 176637435      | 176637435    | C                | T              | 0.162791         |                   |                                                                 |
| TCGA-BA-A6DL-01A-21D-A30E-08 | p.R1072X       | Nonsense             | 176638614      | 176638614    | C                | T              | 0.171598         |                   |                                                                 |
| TCGA-BA-A6DL-01A-21D-A30E-08 | p.R1200fs      | Frame_Shift_Del      | 176638999      | 176639006    | GGGATGAG         | -              | 0.211268         |                   |                                                                 |
| TCGA-H7-A6C5-01A-11D-A30E-08 | p.1664_1665    | nonFrame_Shift_Del   | 176687015      | 176687017    | TCC              | -              | 0.586207         |                   |                                                                 |
| TCGA-D6-A6E0-01A-11D-A31L-08 | p.E2028fs      | Frame_Shift_Del      | 176710861      | 176710861    | A                | -              | 0.581633         |                   |                                                                 |
| TCGA-D6-A74Q-01A-11D-A34J-08 | p.P753fs       | Frame_Shift_Del      | 176637659      | 176637659    | A                | -              | 0.357142         |                   |                                                                 |
| TCGA-CN-A6V3-01A-12D-A34J-08 | p.C1710Y       | Missense             | 176687152      | 176687152    | G                | A              | 0.096774         | High              |                                                                 |
| TCGA-CN-A6V3-01A-12D-A34J-08 | p.W1769C       | Missense             | 176696606      | 176696606    | G                | T              | 0.45             | Medium            |                                                                 |
| TCGA-UF-A71D-01A-12D-A34J-08 | p.T922fs       | Frame_Shift_Del      | 176638165      | 176638165    | C                | -              | 0.433962         |                   |                                                                 |
| TCGA-BA-A6DE-01A-22D-A31L-08 | p.E1575X       | Nonsense             | 176678812      | 176678812    | G                | T              | 0.47619          |                   |                                                                 |
| TCGA-CV-A6JU-01A-11D-A31L-08 | p.Y1941fs      | Frameshift Insertion | 176707765      | 176707765    | -                | T              | 0.232143         |                   |                                                                 |
| TCGA-QK-A6VB-01A-12D-A34J-08 | p.Y1834fs      | Frameshift Insertion | 176696801      | 176696801    | -                | A              | 0.659091         |                   |                                                                 |
| TCGA-P3-A6T8-01A-11D-A34J-08 | p.S2664fs      | Frame_Shift_Del      | 176722361      | 176722361    | T                | -              | 0.46             |                   |                                                                 |
| TCGA-UF-A719-01A-12D-A34J-08 | p.S1528Y       | Missense             | 176675267      | 176675267    | C                | A              | 0.7              | Low               | Sample also has H3K36M mutation                                 |
| TCGA-UF-A71F-01A-11D-A34J-08 | p.E1853X       | Nonsense             | 176700720      | 176700720    | G                | T              | 0.494118         |                   |                                                                 |
| TCGA-QK-A8Z8-01A-11D-A391-08 | p.H1872fs      | Frame_Shift_Del      | 176700778      | 176700779    | AT               | -              | 0.708333         |                   |                                                                 |

**Supplementary Table 2. Complex genomic events in H3K36 samples with no NSD1 or H3K36M mutations by Whole Exome Sequencing.** LOH=Loss Of Heterozygosity; NA=Not Available

| <b>Sample</b> | <b>Result</b>             | <b>GISTIC NSD1<br/>Gene Value</b> | <b>GISTIC NSD1<br/>Gene Threshold</b> |
|---------------|---------------------------|-----------------------------------|---------------------------------------|
| CV-7091       | LOH                       | -0.36                             | -1                                    |
| CN-4731       | Focal Deletion of 8 exons | -1.243                            | -2                                    |
| D6-6823       | Splicing defect           | -0.508                            | -1                                    |
| CN-6988       | LOH                       | -0.563                            | -1                                    |
| BA-4074       | No expression             | NA                                | NA                                    |
| CV-7428       | Not sequenced             | -0.002                            | 0                                     |
| CV-7435       | No expression             | -1.047                            | -2                                    |
| UF-A7JH       | Focal deletion exons 4-18 | -1.295                            | -2                                    |

**Supplementary Table 3. NSD1 mutations in samples excluded from the H3K36 cluster.** Hugo Symbol NSD1, Chromosome 5.

| Sample ID                    | Protein Change | Mutation Type   | Start Position | End Position | Reference Allele | Variant Allele | Allele Frequency | Mutation Assessor |
|------------------------------|----------------|-----------------|----------------|--------------|------------------|----------------|------------------|-------------------|
| TCGA-CN-4739-01A-02D-1512-08 | p.C1710S       | Missense        | 176687152      | 176687152    | G                | C              | 0.291667         | High              |
| TCGA-HD-7917-01A-11D-2229-08 | p.E1202fs      | Frame_Shift_Del | 176639004      | 176639004    | G                | -              | NA               |                   |
| TCGA-DQ-7595-01A-11D-2229-08 | p.P803fs       | Frame_Shift_Del | 176637807      | 176637807    | C                | -              | NA               |                   |
| TCGA-CR-6481-01A-11D-1870-08 | p.D1489N       | Missense        | 176673765      | 176673765    | G                | A              | 0.185714         | Neutral           |
| TCGA-CR-7395-01A-11D-2012-08 | p.L2054R       | Missense        | 176715829      | 176715829    | T                | G              | NA               | High              |
| TCGA-CV-6942-01A-21D-2012-08 | p.E2467Q       | Missense        | 176721768      | 176721768    | G                | C              | 0.164384         | Low               |
| TCGA-CV-6956-01A-21D-2012-08 | p.R1984X       | Nonsense        | 176709523      | 176709523    | C                | T              | 0.578125         |                   |
| TCGA-CR-7385-01A-11D-2012-08 | p.R1700X       | Nonsense        | 176687121      | 176687121    | C                | T              | 0.072463         |                   |
| TCGA-CV-7427-01A-11D-2078-08 | p.D1992H       | Missense        | 176709547      | 176709547    | G                | C              | 0.261261         | Neutral           |
| TCGA-CV-7427-01A-11D-2078-08 | p.D2002H       | Missense        | 176709577      | 176709577    | G                | C              | 0.258427         | Medium            |
| TCGA-CN-5360-01A-01D-1434-08 | p.S744X        | Nonsense        | 176637631      | 176637631    | C                | G              | 0.308642         |                   |
| TCGA-CV-6003-01A-11D-1683-08 | p.I2113M       | Missense        | 176719035      | 176719035    | C                | G              | 0.111111         | Low               |
| TCGA-CV-6441-01A-11D-1683-08 | p.D325V        | Missense        | 176618931      | 176618931    | A                | T              | 0.724138         | Medium            |
| TCGA-CV-6961-01A-21D-1912-08 | p.S96C         | Missense        | 176562391      | 176562391    | C                | G              | 0.206897         | Neutral           |
| TCGA-CV-7568-01A-11D-2229-08 | p.P434L        | Missense        | 176636701      | 176636701    | C                | T              | 0.40625          | Low               |
| TCGA-CV-7568-01A-11D-2229-08 | p.P434S        | Missense        | 176636700      | 176636700    | C                | T              | 0.412698         | Low               |
| TCGA-D6-8569-01A-11D-2394-08 | p.V366L        | Missense        | 176631153      | 176631153    | G                | T              | 0.279221         | Low               |
| TCGA-CV-A468-01A-11D-A25Y-08 | p.R1320X       | Nonsense        | 176665274      | 176665274    | C                | T              | 0.067961         |                   |
| TCGA-CV-A45Z-01A-21D-A25D-08 | p.K601X        | Nonsense        | 176637201      | 176637201    | A                | T              | 0.173077         |                   |
| TCGA-F7-A623-01A-11D-A28R-08 | p.E1520K       | Missense        | 176675242      | 176675242    | G                | A              | 0.116279         | Low               |
| TCGA-UF-A71B-01A-12D-A34J-08 | p.G566E        | Missense        | 176637097      | 176637097    | G                | A              | 0.139785         | Neutral           |
| TCGA-TN-A7HL-01A-11D-A34J-08 | p.R1634Q       | Missense        | 176684087      | 176684087    | G                | A              | 0.242424         | Medium            |
| TCGA-P3-A6T6-01A-11D-A34J-08 | p.E1516X       | Nonsense        | 176675230      | 176675230    | G                | T              | 0.636364         |                   |
| TCGA-QK-AA3J-01A-11D-A391-08 | p.R788X        | Nonsense        | 176637762      | 176637762    | C                | T              | 0.71875          |                   |

Supplementary Table 4. H3K36M Mutations in TCGA HNSCCs

| Hugo Symbol | Sample ID                    | Protein Change | Mutation Type     | Chromosome | Start Position | End Position | Reference Allele | Variant Allele | Allele Frequency |
|-------------|------------------------------|----------------|-------------------|------------|----------------|--------------|------------------|----------------|------------------|
| H3F3B       | TCGA-CQ-6228-01A-11D-1912-08 | p.K37M*        | nonsynonymous SNV | 17         | 73775146       | 73775146     | T                | A              | 0.416667         |
| H3F3B       | TCGA-QK-A827-01A-11D-A391-08 | p.K37M         | nonsynonymous SNV | 17         | 73775146       | 73775146     | T                | A              | 0.552941         |
| HIST1H3C    | TCGA-CN-4740-01A-01D-1434-08 | p.K37M         | nonsynonymous SNV | 6          | 26045748       | 26045748     | A                | T              | 0.163636         |
| HIST1H3C    | TCGA-CQ-6225-01A-11D-1912-08 | p.K37M         | nonsynonymous SNV | 6          | 26045748       | 26045748     | A                | T              | 0.33871          |
| HIST1H3C    | TCGA-CQ-A4C9-01A-11D-A25D-08 | p.K37M         | nonsynonymous SNV | 6          | 26045748       | 26045748     | A                | T              | 0.315789         |
| HIST1H3C    | TCGA-MT-A67D-01A-31D-A30E-08 | p.K37M         | nonsynonymous SNV | 6          | 26045748       | 26045748     | A                | T              | 0.20202          |
| HIST1H3E    | TCGA-CV-6954-01A-11D-1912-08 | p.K37M         | nonsynonymous SNV | 6          | 26225492       | 26225492     | A                | T              | 0.619354         |
| HIST1H3G    | TCGA-UF-A7JD-01A-11D-A34J-08 | p.K37M         | nonsynonymous SNV | 6          | 26271503       | 26271503     | T                | A              | 0.227941         |
| HIST1H3I    | TCGA-CV-7263-01A-11D-2012-08 | p.K37M         | nonsynonymous SNV | 6          | 27839984       | 27839984     | T                | A              | 0.197674         |
| HIST1H3I    | TCGA-UF-A719-01A-12D-A34J-08 | p.K37M         | nonsynonymous SNV | 6          | 27839984       | 27839984     | T                | A              | 0.281481         |
| HIST2H3D    | TCGA-CX-7086-01A-11D-2078-08 | p.K37M         | nonsynonymous SNV | 1          | 149785127      | 149785127    | T                | A              | 0.125            |

\*K37M is the universal nomenclature when describing amino acid changes in genomic data. We note that histone proteins have the first methionine removed from the final product thus shifting the numbering by one amino acid. In the context of protein sequences, this mutation will generally be referred to as K36M.

**Supplementary Table 6. Meta analysis of previous HNSCC sequencing studies reveals other NSD1 and H3K36M mutations.** Table adapted from *Riaz, Morris, Lee, & Chan. Unraveling the molecular genetics of head and neck cancer through genome-wide approaches. Genes Dis 1; 75-86, 2014*

| Sequencing Study<br>(# Samples Sequenced) | NSD1                                                                                                                                                                                                                                                                | H3K36M                               |
|-------------------------------------------|---------------------------------------------------------------------------------------------------------------------------------------------------------------------------------------------------------------------------------------------------------------------|--------------------------------------|
| Stransky (74)                             | p.C1710* (Larynx, Smoker, HPV-),<br>p.C2124Y (Larynx, Smoker, HPV-),<br>p.P1726H (Larynx, Smoker, HPV-),<br>p.R1233fs (Larynx, Smoker, HPV-),<br>p.R1984Q (Hypopharynx, Smoker, HPV-),<br>p.Y1834fs (Larynx, Smoker, HPV-),<br>splicing (Oral Cavity, Smoker, HPV-) | HIST1H3H (Oral Cavity, Smoker, HPV-) |
| Agrawal (32)                              | 0                                                                                                                                                                                                                                                                   | 0                                    |
| Pickering (40)                            | p.R2017Q (Tongue, Smoker, HPV-),<br>p.W2032R (FOM, Smoker, HPV-),<br>p.R1984X (FOM, Smoker, HPV-)                                                                                                                                                                   | 0                                    |
| India ICGC (50)                           | p.Q517* (Gingivo-buccal oral , NA, NA) ,<br>p.S958L (Gingivo-buccal oral , NA, NA),<br>p.R1811* (Gingivo-buccal oral , NA, NA),<br>p.C1911F (Gingivo-buccal oral , NA, NA)                                                                                          | 0                                    |
